# Supplementary material for: Herpesvirus Entry Mediator as an Immune Checkpoint Target and a Potential Prognostic Biomarker in Myeloid and Lymphoid Leukemia
Source: MDPI journal article supplement (doi:10.3390/biom14050523), 2024-04-27
Supplement: s1 [file s1]

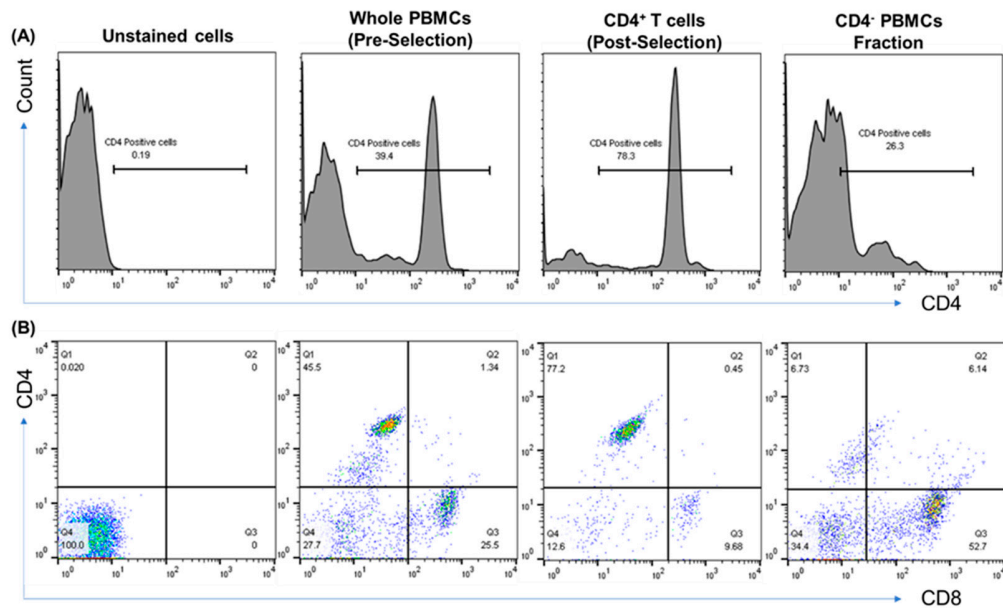

**Supplementary Figure S1.** Flow cytometric analysis of CD4<sup>+</sup> T cell purification. **(A)** Histogram graphs representing the counts cells and CD4 expression throughout the different separation steps (Top: 1st unstained, 2nd pre-selection, 3rd post-selection, 4th CD4<sup>-</sup> fraction). **(B)** Dot plot graphs of cells stained with anti-CD4 (vertical axis) and anti-CD8 mAbs (horizontal axis) (Bottom: 1st unstained, 2nd pre-selection, 3rd post-selection, 4th CD4<sup>-</sup> fraction). Results are collected from 3 separate experiments.
